# Supplementary material for: Thermite-driven melamine condensation to CxNyHz graphitic ternary polymers: towards an instant, large-scale synthesis of g-C3N4
Source: Royal Society of Chemistry journal article supplement (doi:10.1039/c5ta00201j), 2015-01-01
Supplement: c5ta00201j1.pdf [file c5ta00201j1.pdf]

Supporting information for:

**Thermite-Driven Melamine Condensation to  $C_xN_yH_z$  Graphitic Ternary Polymers:  
Towards an Instant, Large-Scale Synthesis of  $g-C_3N_4$**

**S. Dyjak<sup>a</sup>, W. Kiciński<sup>a</sup>, A. Huczko<sup>b</sup>**

<sup>a</sup>Institute of Chemistry, Military University of Technology, 2 Kaliskiego Street, 00-908  
Warsaw, Poland

<sup>b</sup>Department of Chemistry, Warsaw University, 1 Pasteura Street, 02-903 Warsaw, Poland

**Materials and Characterization techniques**

Iron oxide ( $Fe_2O_3 \cdot FeO$ ), obtained directly from a steel producer (ArcelorMittal, Warsaw), aluminum powder (Al, Benda-Lutz Skawina), aluminum oxide ( $Al_2O_3$ , POCH Gliwice), and 2,4,6-triamino-*s*-triazine (melamine,  $C_3H_6N_6$ , Fluka) were used as received. An elemental analysis (EA) was performed using a Vario ELIII analyzer. A thermogravimetric analysis (TGA) was performed using a Labsys TG/DTA (Setaram) thermal analyzer in a flowing Ar atmosphere (99,999%; AirProducts) from room temperature up to 1000 °C. The XRD patterns of the powders were collected within a  $2\theta$  range from 10 to 60° on a D500 Diffractometer (Siemens) in conjunction with  $CuK\alpha$  radiation. To precisely monitor the temperature of the melamine condensation reaction, type K thermocouples with 0.50 mm diameter, (Omega) were used. A computer-assisted data logger (NI 9219, National Instruments) recorded the thermoelectric power continuously with a sampling frequency of 10 Hz. Fourier transform infrared spectroscopy (ATR/FT-IR) data was obtained using the Nicolet iS10 (Thermo Scientific) apparatus. The X-ray photoelectron spectra (XPS) were performed using a PHI 5000 VersaProbe (ULVAC-PHI) spectrometer with monochromatic Al  $K\alpha$  radiation ( $h\nu = 1486.6$  eV) as the X-ray excitation source. A scanning electron microscope (SEM) operating at an accelerating voltage of 2kV (LEO 1530 apparatus) was used to study the morphology of the condensation products. The Brunauer–Emmett–Teller specific surface area ( $S_{BET}$ ) was calculated from the nitrogen adsorption isotherm in the  $p/p_0$  range of 0.05 – 0.25. The  $N_2$  physisorption measurements were performed at -196 °C using an ASAP 2020 Surface Area and a Porosimetry Analyzer (Micromeritics). The  $C_xN_yH_z$  materials' skeletal density was

measured using an AccuPyc II 1340 helium pycnometer (Micromeritics, helium purity of 99,999%).

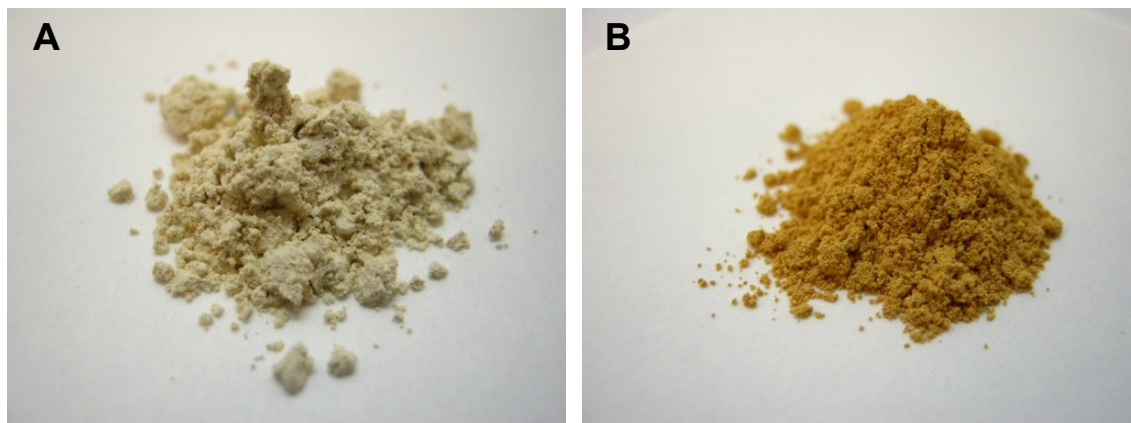

**Fig. S1. Raw products of melamine condensation heated by  $\text{Fe}_2\text{O}_3 \cdot \text{FeO}/\text{Al} + 15 \text{ wt } \%$  of  $\text{Al}_2\text{O}_3$ , Sample I (A), and by  $\text{Fe}_2\text{O}_3 \cdot \text{FeO}/\text{Al} + 5 \text{ wt } \%$  of  $\text{Al}_2\text{O}_3$ , Sample II (B).**

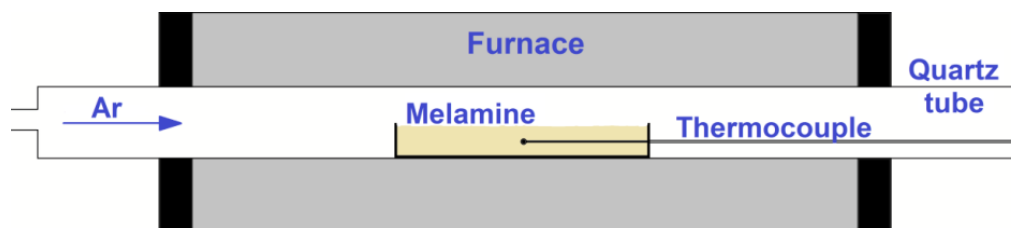

**Fig. S2. Scheme of the experimental system using resistance tube furnace.**

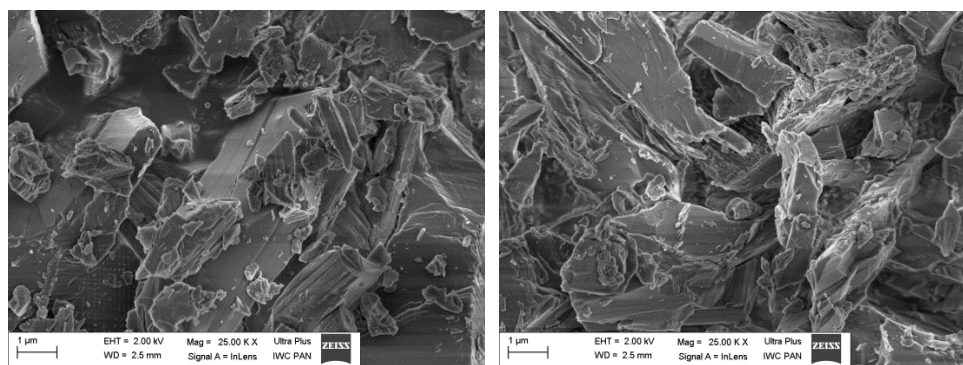

**Fig. S3. SEM microphotographs of the condensation products; melamine heated by  $\text{Fe}_2\text{O}_3 \cdot \text{FeO}/\text{Al} + 15 \text{ wt } \%$  of  $\text{Al}_2\text{O}_3$ , Sample I.**

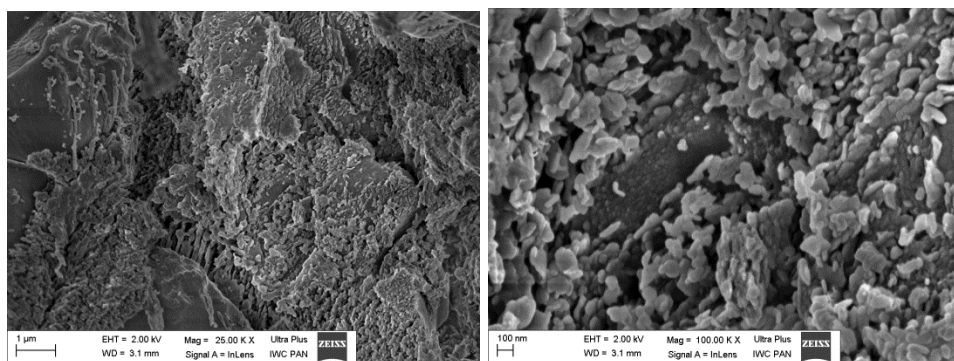

**Fig. S4. SEM microphotographs of the condensation products; melamine heated by  $\text{Fe}_2\text{O}_3 \cdot \text{FeO}/\text{Al} + 5 \text{ wt } \% \text{ of } \text{Al}_2\text{O}_3$ , Sample II.**

**Table S1. Physical parameters of the  $\text{C}_x\text{N}_y\text{H}_z$  graphitic ternary polymers.**

| Sample no. | $S_{\text{BET}}$ ( $\text{m}^2/\text{g}$ ) | Density ( $\text{g}/\text{cm}^3$ ) |
|------------|--------------------------------------------|------------------------------------|
| Melamine   | -                                          | 1.57                               |
| Sample I   | 4.1                                        | 1.75                               |
| Sample II  | 13.3                                       | 1.90                               |
| Sample III | 7.0                                        | 1.81                               |
| Sample IV  | 9.9                                        | 1.85                               |

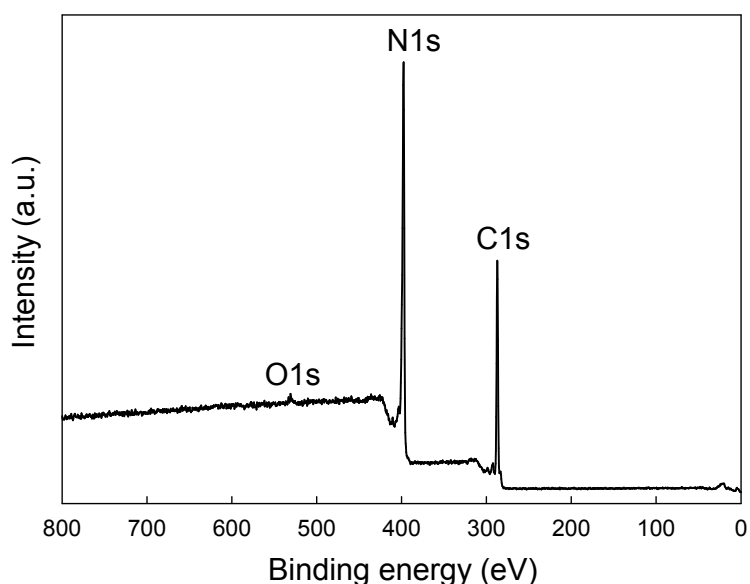

**Fig. S5. X-ray photoelectron full survey spectrum of condensation product obtained by thermite-heated condensation ( $\text{Fe}_2\text{O}_3 \cdot \text{FeO}/\text{Al} + 5 \text{ wt } \% \text{ of } \text{Al}_2\text{O}_3$ , Sample II).**

## Evaluation of the photocatalytic properties

The photograph of the reactor set-up used for evaluating  $C_xN_yH_z$  photocatalyst activity towards degradation of rhodamine B (RhB) is presented in Fig. S6. A 150 W tungsten-halogen lamp (Osram) was placed in a cylindrical glass vessel with a glass jacket filled with flowing water to keep the system cool and at constant temperature. The lamp was immersed inside the beaker with the RhB/ $C_xN_yH_z$  mixture to assure maximum, uniform irradiation. The emission property (intensity as a function of wavelength) of the tungsten lamp with the cooling system was estimated using a USB2000+ (Ocean Optics) general-purpose UV-Vis-NIR spectrometer (Fig. S7). The RhB degradation efficiency was determined by dividing  $C/C_0$ , where  $C$  is the RhB concentration after a particular time of illumination and  $C_0$  is the starting concentration of RhB (after subtracting the fraction of RhB, that was adsorbed by the  $C_xN_yH_z$  polymer surface by stirring the catalyst with RhB for 60 minutes in the dark). In each test 75 mg of  $C_xN_yH_z$  ternary polymer was dispersed in RhB aqueous solution (150 mL, 10 mg/L). At 15 min intervals, 4 mL of the suspension was collected and centrifuged at 4000 rpm for 3 minutes to remove the catalyst. A Cary 3E UV-Visible spectrophotometer (Varian) was used to monitor the changes of RhB concentration. The RhB concentration was calculated using a calibration curve. The maximum absorption was recorded at 553 nm and used for evaluating the decreasing concentration (Fig. S8).

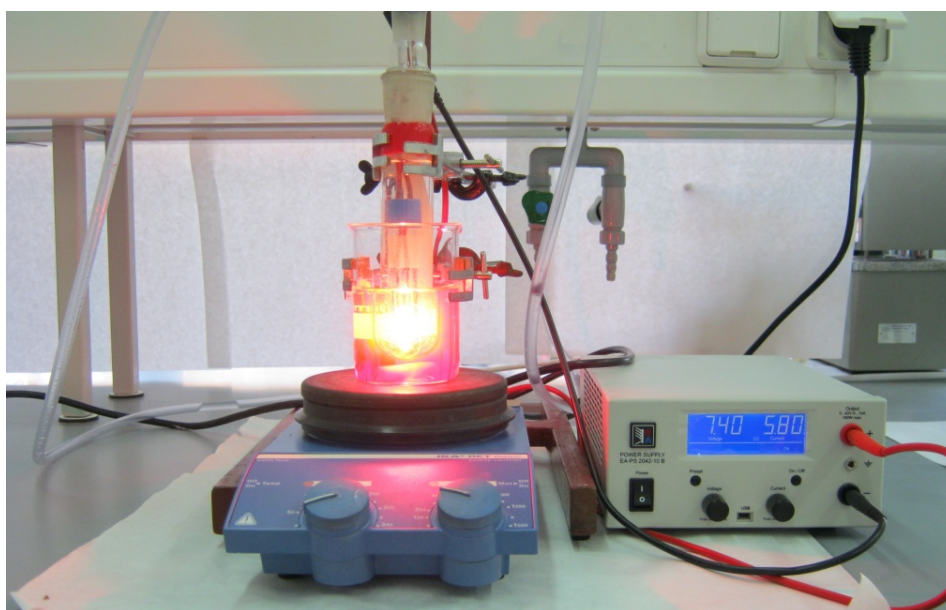

**Fig. S6. Reactor set-up used for evaluating  $C_xN_yH_z$  photocatalyst activity towards degradation of rhodamine B.**

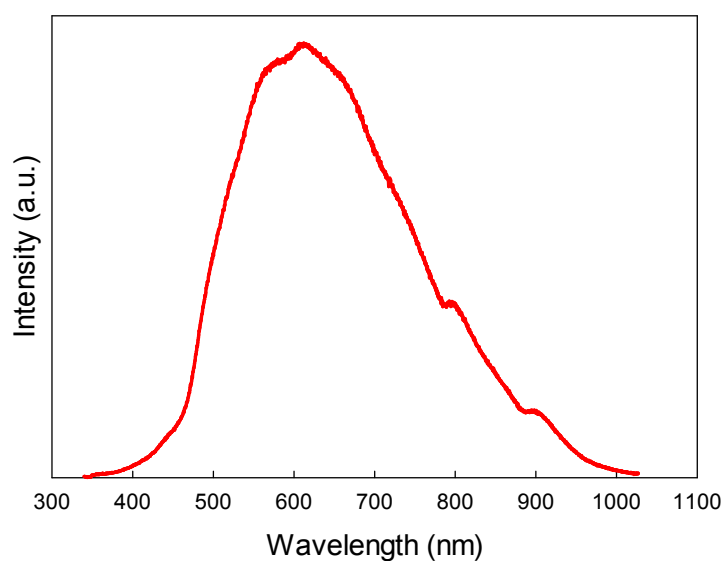

**Fig. S7. Emission properties of the tungsten-halogen lamp with the cooling water jacket.**

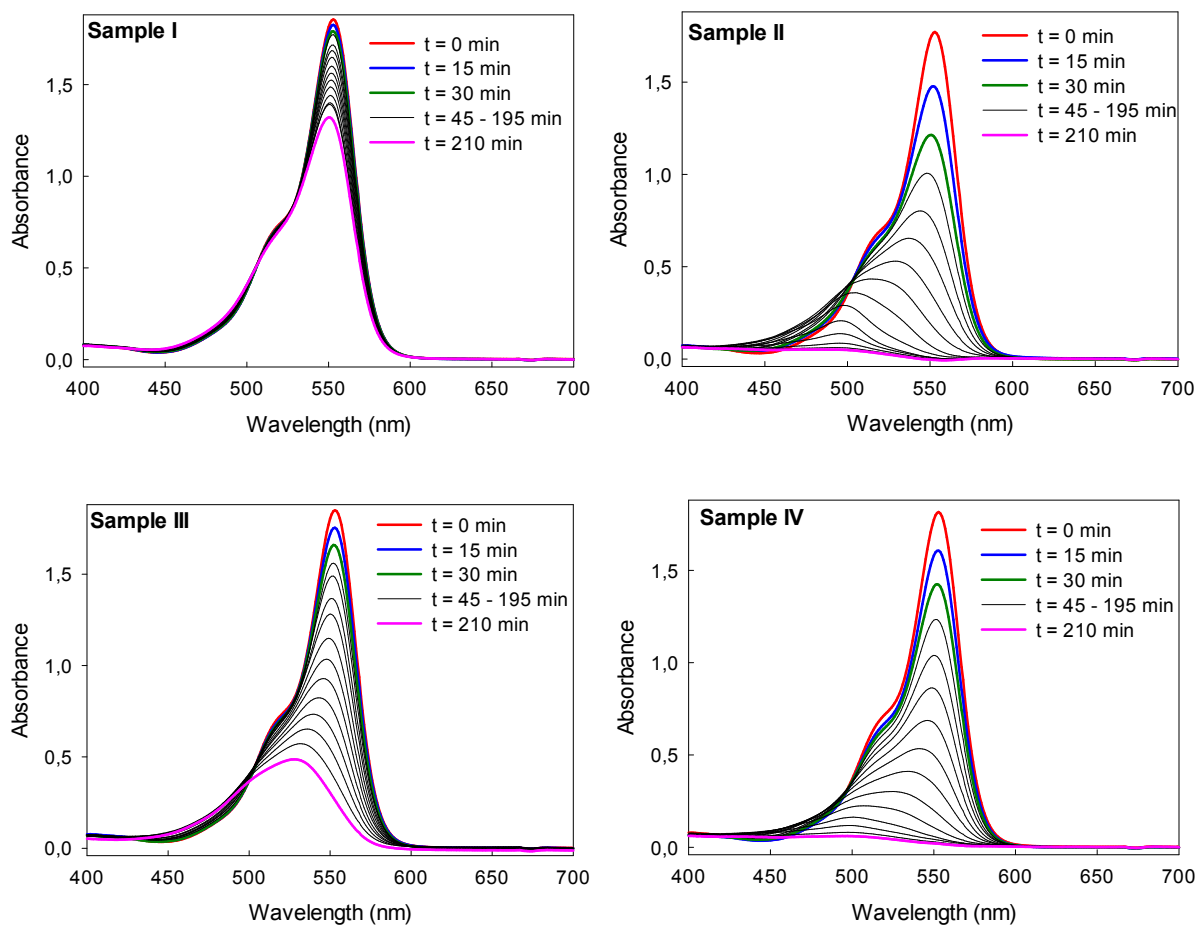

**Fig. S8. Absorption spectra of RhB aqueous solutions after different illumination times.**
